# Supplementary material for: Glasgow prognostic score is a better predictor of the long-term survival in patients with gastric cancer, compared to the modified Glasgow prognostic score or high-sensitivity modified Glasgow prognostic score
Source: PubMed Central journal article supplement (PMC7665228; doi:10.18632/oncotarget.27796), 2020-11-10
Supplement: oncotarget-11-4169-s001.pdf [file oncotarget-11-4169-s001.pdf]

## **Glasgow prognostic score is a better predictor of the long-term survival in patients with gastric cancer, compared to the modified Glasgow prognostic score or high-sensitivity modified Glasgow prognostic score**

### **SUPPLEMENTARY MATERIALS**

**Supplementary Table 1: Associations of clinical characteristics with GPS, mGPS, and HS-mGPS.**  
See Supplementary Table 1
